# Supplementary material
Source: PubMed Central journal article supplement (PMC9608062)
Supplement: mmc1.pdf [file mmc1.pdf]

## **Supplemental information**

### **Antibody escape of SARS-CoV-2**

#### **Omicron BA.4 and BA.5**

#### **from vaccine and BA.1 serum**

**Aekkachai Tuekprakhon, Rungtiwa Nutalai, Aiste Dijokaite-Guraliuc, Daming Zhou, Helen M. Ginn, Muneeswaran Selvaraj, Chang Liu, Alexander J. Mentzer, Piyada Supasa, Helen M.E. Duyvesteyn, Raksha Das, Donal Skelly, Thomas G. Ritter, Ali Amini, Sagida Bibi, Sandra Adele, Sile Ann Johnson, Bede Constantinides, Hermione Webster, Nigel Temperton, Paul Klenerman, Eleanor Barnes, Susanna J. Dunachie, Derrick Crook, Andrew J. Pollard, Teresa Lambe, Philip Goulder, Neil G. Paterson, Mark A. Williams, David R. Hall, OPTIC Consortium, ISARIC4C Consortium, Elizabeth E. Fry, Jiandong Huo, Juthathip Mongkolsapaya, Jingshan Ren, David I. Stuart, and Gavin R. Screaton**

Table S1: Structure determination and refinement. Related to Methods.

|                                       |                                               |
|---------------------------------------|-----------------------------------------------|
| <b>Structure</b>                      | <b>BA.4/5 RBD/Beta-27/NbC1, PDB: 7ZXU</b>     |
| <b>Data collection</b>                |                                               |
| Space group                           | P2 <sub>1</sub> 2 <sub>1</sub> 2 <sub>1</sub> |
| Cell dimensions                       |                                               |
| a, b, c (Å)                           | 84.1, 100.4, 105.4                            |
| $\alpha$ , $\beta$ , $\gamma$ (°)     | 90, 90, 90                                    |
| Resolution (Å)                        | 66–1.89 (1.92–1.89) <sup>a</sup>              |
| R <sub>merge</sub>                    | 0.313 (---)                                   |
| R <sub>pim</sub>                      | 0.061 (0.848)                                 |
| I/s(I)                                | 7.7 (0.5)                                     |
| CC <sub>1/2</sub>                     | 0.996 (0.418)                                 |
| Completeness (%)                      | 100 (99.4)                                    |
| Redundancy                            | 27.4 (28.2)                                   |
|                                       |                                               |
| <b>Refinement</b>                     |                                               |
| Resolution (Å)                        | 66–1.89                                       |
| No. reflections                       | 68286/3756                                    |
| R <sub>work</sub> / R <sub>free</sub> | 0.183/0.210                                   |
| No. atoms                             |                                               |
| Protein                               | 5805                                          |
| Ligand/ion/water                      | 672                                           |
| B factors (Å <sup>2</sup> )           |                                               |
| Protein                               | 39                                            |
| Ligand/ion/water                      | 47                                            |
| r.m.s. deviations                     |                                               |
| Bond lengths (Å)                      | 0.002                                         |
| Bond angles (Å)                       | 0.5                                           |

Table S1
